1 **Cementochronology using synchrotron radiation tomography to determine**  
2 **age at death and developmental rate in the holotype of *Homo luzonensis***

3

4 Anneke H. van Heteren<sup>\*1,2,3</sup>, Andrew King<sup>4</sup>, Felisa Berenguer<sup>5</sup>, Armand Salvador  
5 Mijares<sup>6,7</sup>, Florent Détroit<sup>8</sup>

6

7 <sup>1</sup>Zoologische Staatssammlung München, Staatliche Naturkundliche Sammlungen  
8 Bayerns, Münchhausenstraße 21, 81247 München, Germany

9 <sup>2</sup>GeoBio-Center, Ludwig-Maximilians-Universität München, 80539 München,  
10 Germany.

11 <sup>3</sup>Department Biologie II, Ludwig-Maximilians-Universität München, 82152  
12 Planegg-Martinsried, Germany

13 <sup>4</sup>PSICHÉ Beamline, Synchrotron SOLEIL, L'orme des Merisiers, 91192 Gif-sur-  
14 Yvette, France

15 <sup>5</sup>IPANEMA, CNRS, Synchrotron SOLEIL, L'Orme des Merisiers, 91192 Gif-sur-  
16 Yvette, France

17 <sup>6</sup>School of Archaeology, University of the Philippines, Quezon City, Philippines

18 <sup>7</sup>National Museum of the Philippines, Manila, Philippines

19 <sup>8</sup>UMR 7194, CNRS, Département Homme & Environnement, Muséum National  
20 d'Histoire Naturelle, Musée de l'Homme, 17 Place du Trocadéro, 75116 Paris,  
21 France

22 \*corresponding author

23

24 **Abstract**

25 *Homo luzonensis*, a fossil hominin from the Philippines, is smaller than modern  
26 humans. At present, very little is known about the life history of this species.  
27 Cementochronology can answer life history questions, but usually involves  
28 destructive sampling. Here, we use synchrotron radiation to count the yearly  
29 cement lines of teeth belonging to a single individual. This approach allows us to  
30 determine that this individual was likely 31 years old at time of death and  
31 apparently had a developmental pattern comparable to chimpanzees. To our  
32 knowledge, this is the first time that cementochronology using synchrotron  
33 radiation tomography is used for life history and age-at-death estimation.

34

35 **Introduction**

36 Islands provide amazing examples of evolution and have inspired both Charles  
37 Darwin and Alfred Russel Wallace. Nonetheless, little is known about insular  
38 evolution, often resulting in miniature or giant versions of mainland animals (1).  
39 Whether hominins are also subject to the insular dwarfing to the same degree as  
40 other taxa, is still a matter of debate (2, 3) and possible examples include the  
41 *Homo floresiensis* from Indonesia (4) and *Homo luzonensis* from the Philippines  
42 (5).  
43 The remains of *Homo luzonensis* were found in Callao Cave on Luzon Island and  
44 were described in 2019 (6). The holotype of the species consists, amongst other  
45 bones and teeth, of a dental series from upper right P<sup>3</sup> to upper right M<sup>3</sup>, CCH6-a  
46 to CCH6-e, (6). The teeth are characterised by their small size and mosaic of  
47 primitive and derived features (7). Two *Homo luzonensis* elements, the third  
48 metatarsal CCH1 and the upper right M3 CCH6-a, were directly dated to  
49 minimum ages of 67 thousand years (kyr) and 50 kyr respectively (5, 8). Whether  
50 these hominin remains represent a species that dwarfed under the influence of  
51 insular conditions remains to be determined (6), although a descent from *Homo*  
52 *erectus* seems likely based on the internal organisation of its teeth (7). This begs  
53 the questions: Did the life history parameters of this species differ from that of  
54 other hominins? And, how old was this individual when he or she died?

55 In medical terms, the incremental lines in tooth cementum are called “lines of  
56 Salter”(9, 10). The morphology of tooth cementum resembles lamellar bone (11).  
57 As in the case of lamellar bone (12), there are heavy debates on the nature and  
58 the depositional mechanism of the lines of Salter in tooth cementum (13)  
59 centering around analogous hypotheses. It is generally agreed upon that the  
60 lines of Salter are annual lines representing summer and winter (13).  
61 Nevertheless, the study of seasonality in human cementochronology has mostly  
62 been performed on samples from the northern hemisphere from areas with four  
63 seasons (13). It is still not understood how the colours of the lines of Salter  
64 correspond to the seasons in the southern hemisphere or in areas with  
65 monsoonal seasonality.  
66 There is no evidence for tooth cement abrasion during decomposition, unlike  
67 tooth enamel (14), making tooth cement a promising candidate for chronological  
68 research. No taphonomical studies on geological time scales have thus far been  
69 performed, however. In the present paper, we answer the above research  
70 questions using cementochronology, or tooth cementum annulation, derived from  
71 synchrotron radiation tomography.

72

### 73 **Materials and Methods**

74 In 2015, three teeth (CCH6-d: P<sup>4</sup>; CCH6-c: M<sup>1</sup>; CCH6-b: M<sup>2</sup>) of the holotype of  
75 *Homo luzonensis* were scanned in Synchrotron SOLEIL in France at the PSICHE  
76 beamline. Although other researchers have, in the meantime, also applied  
77 cementochronology to modern human canines using synchrotron radiation (15,  
78 16), this is the first instance, to our knowledge, that synchrotron based  
79 cementochronology is used on 1) a series of teeth belonging to the same  
80 individual, 2) that are completely fossilized, and 3) for the purpose of estimating  
81 life history traits through dental development.

82 Since transverse sections are advised for human teeth (13), P<sup>4</sup> and M<sup>2</sup> were  
83 mapped transversally by performing a mosaic of quick acquisitions, for which the  
84 detector image was binned 4x4 to create an effective pixel size of 2.6 microns.  
85 Each projection required 0.4 s exposure time, and 300 images were acquired

86 over 180° (roughly 2 minutes per tomogram). The reconstructed slices were  
87 used to provide a preview of the transverse section, in order to select the  
88 locations with the best-preserved cement structures (Figure 1). The buccal root  
89 of P<sup>4</sup> is broken off, so the lingual root was mapped. Rather than use a mosaic  
90 mapping approach, M<sup>1</sup> was scanned, also transversally, at a relatively low  
91 resolution with 2.6 micron pixel size, 1500 projections over 180° with 170 mm  
92 propagation distance and 0.15s exposure time at 40 keV (Figure 2).

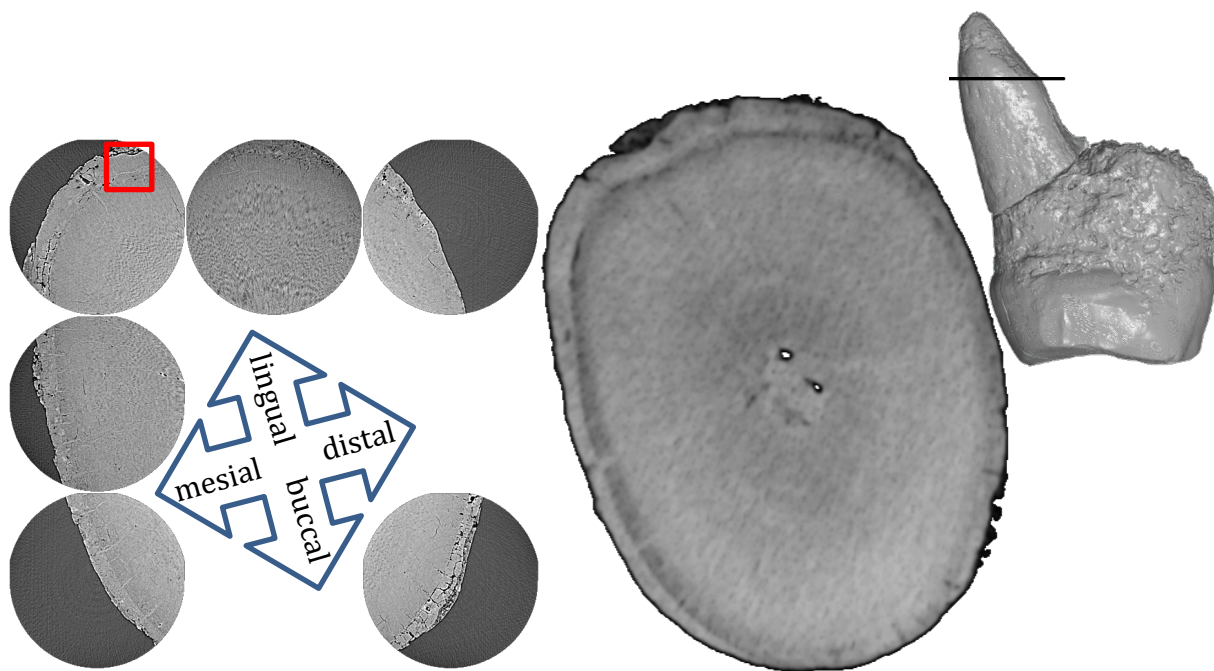

93 *Figure 1: Left: Map at 6 mm from the tip of the root of P<sup>4</sup>(CCH6-d). The red square indicates the position of*  
94 *the detailed scan in Figure 3 at the lingual aspect of the lingual root. Centre: For illustrative purposes, a*  
95 *slice of a micro-CT scan of P<sup>4</sup> (7) at the level of the map. Right: The line in the distal view of the 3D model*  
96 *indicates the level where the scan was made.*

97

98 Based on the maps, 10 appropriate positions for the detailed transverse scans  
99 were chosen on M<sup>2</sup> and 4 on P<sup>4</sup> in areas where acellular cementum was present.  
100 Additionally, five suitable positions for the high-resolution transverse scans were  
101 chosen on M<sup>1</sup>. All detailed transverse scans on the three teeth were scanned at  
102 40 keV, 70 mm propagation distance, with 3x 0.4 s accumulated images and  
103 3000 projections over 360° (roughly 1 hour per tomogram). In all cases, 40 keV  
104 monochromatic radiation was used, with a flux of around 2E11 photons/s/mm<sup>2</sup>.

105 Although acellular cementum is usually utilised for cementochronology (17), the  
106 cellular cementum was better preserved in M<sup>1</sup>, and has also been shown to  
107 consist of yearly lines (18, 19).

108

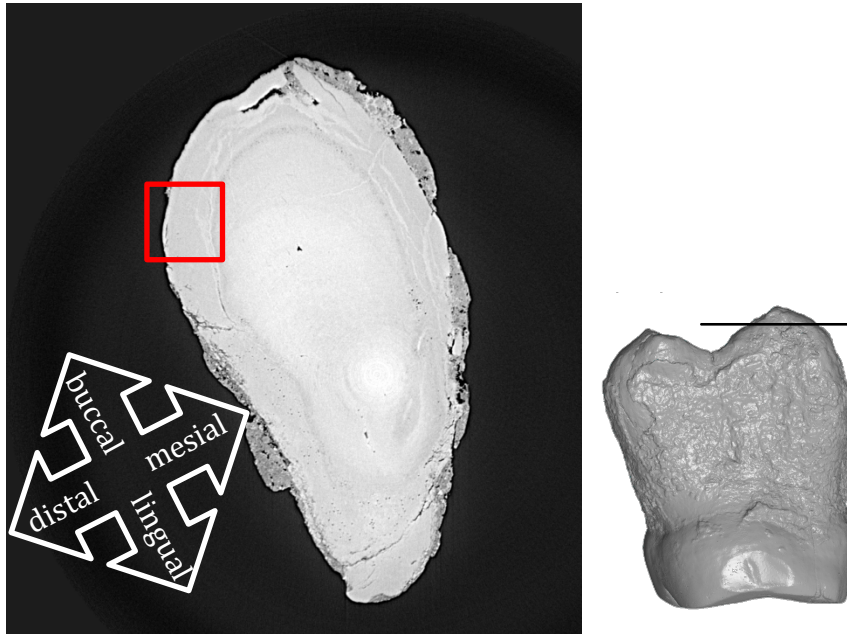

109

110 *Figure 2: Left: Section at 0.93 mm from the buccal tip of the distal root of M<sup>1</sup> (CCH6-c) on a low-resolution*  
111 *scan. The red square indicates the position of the detailed scan of the distobuccal aspect in Figure 4. Right:*  
112 *The line in the distal view of the 3D model indicates the level where the scan was made.*

113

114 After the detailed scans were completed, we chose the clearest images from the  
115 dataset and counted the growth lines manually, since automated counts have  
116 been found to underestimate the total number of increments (20). Growth lines  
117 were counted on multiple images to assure the maximum number of lines was  
118 counted. The lines of Salter were counted multiple times (21) in 2015 and in  
119 2022. In both case the same numbers of lines were found. Representative  
120 images are shown here.

121

## 122 **Results**

123 The cement on the root of M<sup>1</sup> CCH6-c was best preserved out of all three dental  
124 elements. The right upper P<sup>4</sup> CCH6-d is relatively well preserved and displays 24  
125 lines (Figure 3), equivalent to 24 years. The right upper M<sup>1</sup> displays 28 lines in  
126 the tooth root cement (Figure 4), which are equivalent to 28 years. Despite taking

127 detailed scans at 10 positions in M<sup>2</sup>, surface erosion caused the counts to be  
128 incomplete at each position, although it was possible to count the yearly lines.  
129 The difference between the number of lines of P<sup>4</sup> and M<sup>1</sup> is four (=28-24) in the  
130 holotype of *Homo luzonensis* CCH6.  
131

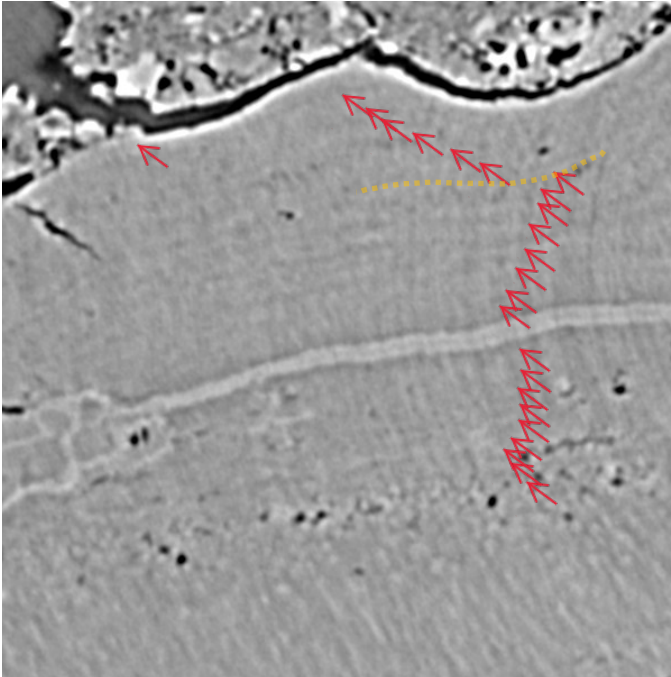

132  
133 *Figure 3: Detailed scan at 6 mm from the root of P<sup>4</sup>. The red arrows indicate the 24 yearly lines. The orange*  
134 *dotted line follows the curvature of the cement lines.*

135

## 136 **Discussion**

### 137 Development and Age at Death

138 To assess age at death, the number of lines of Salter need to be added to the  
139 age at eruption or the age of root completion. The margins of error of these two  
140 approaches are not significantly different, because the timing of these event is  
141 equal on a yearly timescale (13).

142 In *Homo luzonensis* CCH6, the cement of the root of M1 was very well preserved  
143 and the cement lines count can be considered reliable. The cement of P4 was  
144 slightly less well preserved, but was mostly deformed rather than eroded, since  
145 the cement lines follow the shape of the outer surface and the cracks. (Figure 3,  
146 orange dotted line).

147 In anatomically modern humans (*Homo sapiens*), a difference of five lines would  
148 be expected between these dental elements, since the M<sup>1</sup> erupts at age six and  
149 the P<sup>4</sup> at age 11 on average (22). Nevertheless, there is some intraspecific  
150 variation and a difference of four lines may be expected in approximately 5% of  
151 the population (23). In chimpanzees (*Pan troglodytes*) on the other hand M<sup>1</sup>  
152 erupts at age three and P<sup>4</sup> at age seven, so we would expect a difference of four  
153 lines between the M<sup>1</sup> and the P<sup>4</sup> (22). The mean interval in gorillas (*Gorilla gorilla*)  
154 on the other hand would be three lines, since M<sup>1</sup> erupts in the fourth year of life  
155 and P<sup>4</sup> in the seventh (22). Although individual variation needs to be taken into  
156 account (24), cementochronology is the most accurate method for age-at-death  
157 estimation (25), and it is possible to speculate that the dental development  
158 pattern of *H. luzonensis* might have been more similar to that of extant  
159 chimpanzees than to that of anatomically modern humans, although this is not  
160 necessarily a reflection of overall development. Even if an unknown number of  
161 lines would be missing from P<sup>4</sup>, this would imply a developmental strategy quite  
162 dissimilar from modern humans. Consequently, a reasonable estimate for the  
163 eruption ages of M<sup>1</sup>, M<sup>2</sup> and P<sup>4</sup> *H. luzonensis* would be three, six and seven  
164 years old respectively, based on a chimpanzee-like dental development pattern.  
165

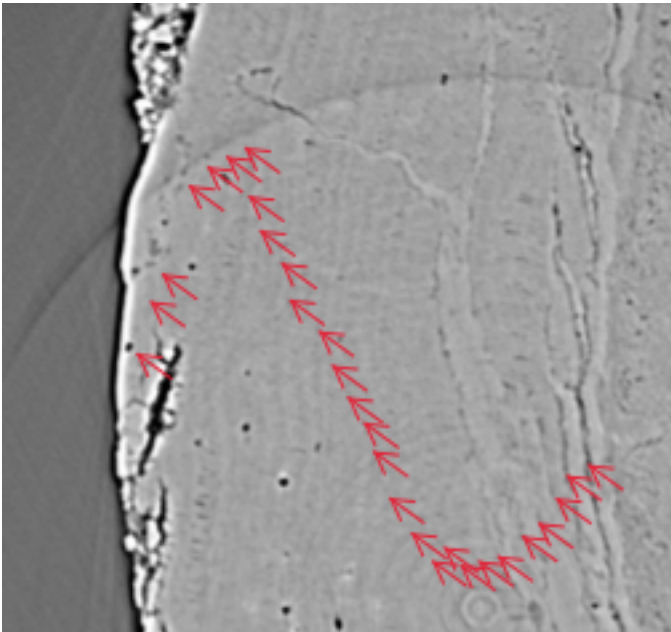

166

167 *Figure 4: Detailed scan at 0.93 mm from the root of M<sup>1</sup>. The red arrows indicate the 28 yearly lines.*

168

169 Assuming a chimpanzee-like developmental pattern based on the M<sup>1</sup>-P<sup>4</sup> eruption  
170 interval, the root of M<sup>1</sup> indicates that CCH6 died at the age of 31, calculated from  
171 28 years of root cement formation and three years of postnatal life before the  
172 eruption of M<sup>1</sup>. P<sup>4</sup>, also points to an age at death of 31 years, consisting of 24  
173 years of root cement formation and seven years of postnatal life before the  
174 eruption of P<sup>4</sup>. A maximum potential age at death for the type specimen of *H.*  
175 *luzonensis* may be calculated by assuming a human-like developmental pattern  
176 with estimated eruption ages of M<sup>1</sup>, M<sup>2</sup> and P<sup>4</sup> of six, 12 and 11 years old. This  
177 would result in an age at death of 34 or 35 years old. Since the ages calculated  
178 assuming a chimpanzee-like developmental pattern correspond perfectly with  
179 each other, we think it is likely that the type specimen of *H. luzonensis* was  
180 approximately 31 years old at time of death but might have been a few years  
181 older.

#### 182 Implications for the Life History of *H. luzonensis*

183 In primates, dental eruption pattern is correlated with brain size (26). The  
184 diminutive size of *H. luzonensis* has already hypothesised (8), so, similar to *H.*  
185 *floresiensis*(27), its brain might also have been small, which would not be  
186 discordant with the dental eruption pattern found in this study.

187 In primates, various life history traits, such as life expectancy, are also correlated  
188 to the dental eruption pattern (28, 29). In anatomically modern humans, life  
189 expectancy has changed over the course of (pre-)history (30). In the Mesolithic,  
190 life expectancy was between 21 and 40 years at birth, whereas in the Neolithic  
191 life expectancy was 17 to 25 years (31). In the Copper, Bronze and Iron ages, life  
192 expectancy at birth was between 28 and 44 years (30). CCH6 died in his or her  
193 early thirties. This seems relatively young for current standards but is in line with  
194 Mesolithic modern humans, as well as corresponding to the potentially fast  
195 development of *H. luzonensis*.

#### 196 Possible Evolutionary Implications

197 *Homo luzonensis*, a small hominin from the Philippines, displays a dental  
198 eruption pattern which could be similar to that of modern chimpanzees, but also



199 occurs in a small portion of the modern human population (23). Consequently, its  
200 life history traits might to follow a more ape-like pattern than a modern human  
201 pattern. This could have implications for human evolution, but more evidence is  
202 clearly needed. It had already been established with *H. floresiensis* that relatively  
203 recent hominins could have brain sizes in the range of chimpanzees (27).

#### 204 Perspectives

205 Here, we used a new methodology to calculate age at death using synchrotron  
206 radiation. This method is non-destructive and can be used on valuable fossils,  
207 such as those of Callao Man. The methodology described herein is a proof of  
208 concept and holds great potential for the study of fossil hominins and other  
209 valuable dental remains that are not suitable for destructive sampling. Although it  
210 is difficult to supply conclusive evidence of life history parameters based on two  
211 teeth, the methodology could be applied to more complete tooth rows with the  
212 prospect of deciphering an individual's complete dental development. Comparing  
213 fossil taxa through time will provide direct evidence for the evolution of dental  
214 development with implications for the associated life history traits. Furthermore,  
215 this method allows for an assessment of age at death and, when applied to  
216 multiple individuals of the same population, might provide an estimate of average  
217 life expectancy. As suggested by von Jackowski et al. (15), studying the yearly  
218 cementum lines over the whole tooth root cross-section might allow for the  
219 detection of potential interruptions or irregularities of the individual layers. These  
220 features may be associated with childbirth in females or certain diseases (32-34)  
221 and could provide valuable information on the life of fossil hominins. As shown in  
222 this work, the potential of using fast, low-resolution measurements combined with  
223 slower, high-resolution measurements in selected areas could be important here.  
224 To apply cementochronology to the lines of Salter, a standardised protocol for  
225 each species, or even each dental element, would be ideal (13). In fossils,  
226 however, this would be problematic. Firstly, it would be extremely difficult, if not  
227 impossible, to ground-truth any such protocol, due to a lack of fossils with known  
228 individual age at death and/or known age at eruption of the respective dental

229 elements. Secondly, due to taphonomical processes, the researcher will have to  
230 work with those parts of the tooth cementum that are sufficiently well-preserved.  
231 Theoretically, it should be possible to determine whether an individual died in  
232 fall/winter or spring/summer. These seasons are characterised by dark or light  
233 lines respectively in light microscopy (13). More research on modern humans is  
234 needed, however, to determine how the cement layers are formed in a  
235 monsoonal climate. It will also be challenging to extrapolate this analysis to  
236 synchrotron radiation tomography. It is not currently known how the dark and  
237 light lines correspond to the dark and light lines in light microscopy, since the  
238 light and dark lines in tomography are caused by differences in density, whereas  
239 the cause of the light and dark lines in normal microscopy is still under debate  
240 (13) and differs according to the type of microscope used (35, 36).  
241 Furthermore, the strong contrast between cementum and air at the surface  
242 generates an intense phase contrast fringe, which interferes with interpretation of  
243 near surface lines. This could be partially improved by surrounding the tooth with  
244 a medium closer to the electron density of cementum, as in Lak et al. (37).

245

#### 246 **Acknowledgements**

247 We thank the National Museum of the Philippines and its Directorial staff for  
248 allowing us to scan the specimens and the Cagayan Provincial Government and  
249 the Protected Area Management Board-Peñablanca for authorizing fieldwork at  
250 Callao Cave. Funding was provided by Muséum national d'Histoire naturelle, the  
251 Wenner-Gren Foundation, the Leakey Foundation Research Grant and the  
252 National Geographic Society, beamtime was granted by Synchrotron Soleil, and  
253 AHvH was supported by a postdoctoral fellowship of the Humboldt Foundation.  
254 The micro-CT scans for illustrative purposes were provided by AST-RX,  
255 plateforme d'Accès Scientifique à la Tomographie à Rayons X, UAR 2700 2AD  
256 Acquisition et Analyse de Données pour l'histoire naturelle CNRS-MNHN, Paris.

257

#### 258 **References**

- 259 1. van der Geer AAE, Lyras G, Vos Jd, Dermitzakis M. Evolution of island  
260 mammals: Adaptation and extinction of placental mammals on islands. 1 ed.  
261 Chichester: Wiley-Blackwell; 2010. 496 p.
- 262 2. Argue D, Groves CP, Lee MSY, Jungers WL. The affinities of *Homo*  
263 *floresiensis* based on phylogenetic analyses of cranial, dental, and postcranial  
264 characters. *Journal of Human Evolution*. 2017;107:107-33.
- 265 3. van Heteren AH. Is LB1 diseased or modern? A review of the proposed  
266 pathologies. *Gene*. 2013;528:12-20.
- 267 4. Brown P, Sutikna T, Morwood MJ, Soejono RP, Jatmiko, Saptomo EW, et  
268 al. A new small-bodied hominin from the Late Pleistocene of Flores, Indonesia.  
269 *Nature*. 2004;431(7012):1055-61.
- 270 5. Mijares AS, Détroit F, Piper P, Grün R, Bellwood P, Aubert M, et al. New  
271 evidence for a 67,000-year-old human presence at Callao Cave, Luzon,  
272 Philippines. *Journal of Human Evolution*. 2010;59(1):123-32.
- 273 6. Détroit F, Mijares AS, Corny J, Daver G, Zanolli C, Dizon E, et al. A new  
274 species of *Homo* from the Late Pleistocene of the Philippines. *Nature*.  
275 2019;568(7751):181-6.
- 276 7. Zanolli C, Kaifu Y, Pan L, Xing S, Mijares AS, Kullmer O, et al. Further  
277 analyses of the structural organization of *Homo luzonensis* teeth: Evolutionary  
278 implications. *Journal of Human Evolution*. 2022;163:103124.
- 279 8. Grün R, Eggers S, Kinsley L, Moseley H, Sambridge M. Laser ablation U-  
280 series analysis of fossil bones and teeth. *Palaeogeography, Palaeoclimatology,*  
281 *Palaeoecology*. 2014;416:150-67.
- 282 9. Berkovitz BK, Holland GR, Moxham BJ. Oral anatomy, histology and  
283 embryology E-book: Elsevier Health Sciences; 2017.
- 284 10. Swetha G, Kattappagari KK, Poosarla CS, Chandra LP, Gontu SR, Badam  
285 VRR. Quantitative analysis of dental age estimation by incremental line of  
286 cementum. *Journal of oral and maxillofacial pathology: JOMFP*. 2018;22(1):138.
- 287 11. Jones SJ, Boyde A. A study of human root cementum surfaces as  
288 prepared for and examined in the scanning electron microscope. *Zeitschrift für*  
289 *Zellforschung und Mikroskopische Anatomie*. 1972;130(3):318-37.
- 290 12. Mitchell J, van Heteren AH. A literature review of the spatial organization  
291 of lamellar bone. *Comptes Rendus Palevol*. 2016;15(1):23-31.
- 292 13. Perrone V, Gocha TP, Randolph-Quinney P, Procopio N. Tooth cementum  
293 annulation: A literature review. *Forensic Sciences*. 2022;2(3):516-50.
- 294 14. Akbulut N, Çetin S, Bilecenoğlu B, Altan A, Akbulut S, Ocak M, et al. The  
295 micro-CT evaluation of enamel-cement thickness, abrasion, and mineral density  
296 in teeth in the postmortem interval (PMI): new parameters for the determination  
297 of PMI. *International Journal of Legal Medicine*. 2020;134(2):645-53.
- 298 15. Von Jackowski J, Müller B, Schulz G, Hotz G, Weitkamp T, Wittwer-  
299 Backofen U, et al. Tomographic imaging of unique objects: annual layers in tooth  
300 cementum of Anna Catharina Bischoff born 1719: SPIE; 2022.
- 301 16. Le Cabec A, Tang NK, Ruano Rubio V, Hillson S. Nondestructive adult  
302 age at death estimation: Visualizing cementum annulations in a known age  
303 historical human assemblage using synchrotron X-ray microtomography.  
304 *American Journal of Physical Anthropology*. 2019;168(1):25-44.

- 305 17. Robbins Schug G, Brandt ET, Lukacs JR. Cementum annulations, age  
306 estimation, and demographic dynamics in Mid-Holocene foragers of North India.  
307 HOMO. 2012;63(2):94-109.
- 308 18. Azorit C, López-Montoya AJ, Mateo-Calahorra BP, Analla M. Seasonal  
309 investigation of fallow deer cellular cementum from Mediterranean ecosystems  
310 and its implications for reliable cementochronology applications. Quaternary  
311 International. 2022;610:133-43.
- 312 19. Takahashi S, Yamamoto T, Takahashi T, Yawaka Y. Incremental lines in  
313 human cellular cementum: A histological study. Journal of Oral Biosciences.  
314 2022.
- 315 20. Czermak A, Czermak A, Ernst H, Grupe G. A new method for the  
316 automated age-at-death evaluation by tooth-cementum annulation (TCA).  
317 Anthropologischer Anzeiger. 2006:25-40.
- 318 21. Bertrand B, Cunha E, Bécart A, Gosset D, Hédouin V. Age at death  
319 estimation by cementochronology: Too precise to be true or too precise to be  
320 accurate? American journal of physical anthropology. 2019;169(3):464-81.
- 321 22. Dean MC, Wood BA. Developing pongid dentition and its use for ageing  
322 individual crania in comparative cross-sectional growth studies. Folia Primatol  
323 (Basel). 1981;36(1-2):111-27.
- 324 23. Savara BS, Steen JC. Timing and sequence of eruption of permanent  
325 teeth in a longitudinal sample of children from Oregon. The Journal of the  
326 American Dental Association. 1978;97(2):209-14.
- 327 24. Machanda Z, Brazeau NF, Bernard AB, Donovan RM, Papakyrikos AM,  
328 Wrangham R, et al. Dental eruption in East African wild chimpanzees. Journal of  
329 Human Evolution. 2015;82:137-44.
- 330 25. Meinl A, Huber CD, Tangl S, Gruber GM, Teschler-Nicola M, Watzek G.  
331 Comparison of the validity of three dental methods for the estimation of age at  
332 death. Forensic Science International. 2008;178(2):96-105.
- 333 26. Godfrey LR, Samonds KE, Jungers WL, Sutherland MR. Teeth, brains,  
334 and primate life histories. Am J Phys Anthropol. 2001;114(3):192-214.
- 335 27. Falk D, Hildebolt C, Smith K, Morwood MJ, Sutikna T, Brown P, et al. The  
336 brain of LB1, *Homo floresiensis*. Science. 2005;308(5719):242-5.
- 337 28. Smith BH. DENTAL DEVELOPMENT AS A MEASURE OF LIFE  
338 HISTORY IN PRIMATES. Evolution. 1989;43(3):683-8.
- 339 29. Harvey PH, Clutton-Brock TH. Life history variation in primates. Evolution.  
340 1985;39(3):559-81.
- 341 30. Galor O, Moav O. The neolithic origins of contemporary variations in life  
342 expectancy. Available at SSRN 1012650. 2007.
- 343 31. Hassan FA. Demographic archaeology. Advances in archaeological  
344 method and theory: Elsevier; 1981. p. 225-79.
- 345 32. Kagerer P, Grupe G. Age-at-death diagnosis and determination of life-  
346 history parameters by incremental lines in human dental cementum as an  
347 identification aid. Forensic Science International. 2001;118(1):75-82.
- 348 33. Cerrito P, Cerrito L, Hu B, Bailey SE, Kalisher R, Bromage TG. Weaning,  
349 parturitions and illnesses are recorded in rhesus macaque (*Macaca mulatta*)

- 350 dental cementum microstructure. *American Journal of Primatology*.  
351 2021;83(3):e23235.
- 352 34. Penezić K, Porčić M, Urban PK, Wittwer-Backofen U, Stefanović S.  
353 Stressful times for women-Increased physiological stress in Neolithic females  
354 detected in tooth cementum. *Journal of Archaeological Science*.  
355 2020;122:105217.
- 356 35. Burke A, Castanet J. Histological observations of cementum growth in  
357 horse teeth and their application to archaeology. *Journal of Archaeological*  
358 *Science*. 1995;22(4):479-93.
- 359 36. Hillson S. Archaeology and the study of teeth. *Endeavour*.  
360 1986;10(3):145-9.
- 361 37. Lak M, Néraudeau D, Nel A, Cloetens P, Perrichot V, Tafforeau P. Phase  
362 contrast X-ray synchrotron imaging: opening access to fossil inclusions in  
363 opaque amber. *Microscopy and microanalysis*. 2008;14(3):251-9.  
364
